## Correction

# Correction: Heterogeneous Effect of Two Selectin Gene Polymorphisms on Coronary Artery Disease Risk: A Meta-Analysis

## The PLOS ONE Staff

A funding organization and grant are incorrectly omitted from the Funding statement. The Funding statement should read: This work was supported by the science and technology fund of Shanghai Jiao Tong University School of Medicine (11XJ21001), the new hundred talents program of Shanghai Municipal Health Bureau (XBR2013100) and the National Natural Science Foundation of China (810701773 & 81370397). The funders had no role in study design, data collection and analysis, decision to publish, or preparation of the manuscript.

## Reference

1. Wu Z, Lou Y, Lu L, Liu Y, Chen Q, et al. (2014) Heterogeneous Effect of Two Selectin Gene Polymorphisms on Coronary Artery Disease Risk: A Meta-Analysis. PLoS ONE 9(2): e88152. doi:10.1371/journal.pone.0088152

---

**Citation:** The PLOS ONE Staff (2014) Correction: Heterogeneous Effect of Two Selectin Gene Polymorphisms on Coronary Artery Disease Risk: A Meta-Analysis. PLoS ONE 9(2): e91648. doi:10.1371/journal.pone.0091648

**Published:** February 28, 2014

**Copyright:** © 2014 The PLOS ONE Staff. This is an open-access article distributed under the terms of the Creative Commons Attribution License, which permits unrestricted use, distribution, and reproduction in any medium, provided the original author and source are credited.
